# Supplementary material for: Clinicopathologic Features of TDO2 Overexpression in Renal Cell Carcinoma
Source: Research Square preprint supplement (doi:10.21203/rs.3.rs-156399/v1), 2021-02-22
Supplement: Supplementary file 1 [file b2b52814e3239bba8d201f93.docx]

**Clinicopathologic features of TDO2 overexpression in renal cell carcinoma**

Quoc Thang Pham1,2, Daiki Taniyama1, Yohei Sekino3, Shintaro Akabane1, Takashi Babasaki1,3, Go Kobayashi1, Naoya Sakamoto1, Kazuhiro Sentani1, Naohide Oue1, Wataru Yasui1

1Department of Molecular Pathology, Hiroshima University Graduate School of Biomedical and Health Sciences, Hiroshima, Japan

2Department of Pathology, University of Medicine and Pharmacy at Ho Chi Minh City, Viet Nam

3Department of Urology, Hiroshima University Graduate School of Biomedical and Health Sciences, Hiroshima, Japan

| **Supplementary Table 1**  List of primary antibodies | | |
| --- | --- | --- |
| Primary antibodies  for IHC | Lot No. (Company) | Dilution |
| ALDH1 | LS-B2497 (LifeSpan BioSciences) | 1:200 |
| CD44 | NBP2-44654 (Novus Biologicals) | 1:50 |
| CD133 | NB120-16518 (Novus Biologicals) | 1:50 |
| EGFR | 4267S (Cell Signaling Technology) | 1:50 |
| HER2 | 2242S (Cell Signaling Technology) | 1:50 |
| p53 | M7001 (Dako) | 1:50 |
| PD-L1 | 13684S (Cell Signaling Technology) | 1:50 |
| TDO2 | H00006999-B01P (Abnova) | 1:200 |
| Primary antibodies  for Western blot | Lot No. (company) |  |
| PTEN | 138G6 (Cell Signaling Technology) | 1:1000 |
| Akt | 9272 (Cell Signaling Technology) | 1:1000 |
| p-Akt | 9271 (Cell Signaling Technology) | 1:1000 |
| ERK | 9102 (Cell Signaling Technology) | 1:1000 |
| p-ERK | 9101 (Cell Signaling Technology) | 1:1000 |
| TDO2 | H00006999-B01P (Abnova) | 1:1000 |
| GAPDH | sc-365062 (Santa Cruz) | 1:20000 |

| **Supplementary Table 2**  Characteristics of 12 patients with clear cell renal cell carcinoma (ccRCC) | |
| --- | --- |
| Characteristic | N (%) |
| Histological classification | 9 (75) |
| ccRCC |  |
| Non-ccRCC | 3 (25) |
| T grade | 6 (50) |
| T1 |  |
| T2/3/4 | 6 (50) |
| N grade | 9 (75) |
| N0 |  |
| N1/2 | 3 (25) |
| M grade | 11 (91.7) |
| M0 |  |
| M1 | 1 (8.3) |
| Stage | 2 (16.7) |
| Stage I |  |
| Stage II/III/IV | 10 (83.3) |
| Histological grade | 0 |
| Grade 1/2 |  |
| Grade 3/4 | 12 (100) |
